# Supplementary material for: Establishment of an ELISA Based on a Recombinant Antigenic Protein Containing Multiple Prominent Epitopes for Detection of African Swine Fever Virus Antibodies
Source: MDPI journal article supplement (doi:10.3390/microorganisms12050943), 2024-05-07
Supplement: s1 [file s1]

|     | <b>A104R-2</b> | <b>B602L-2</b> | <b>B602L-5</b> | <b>P12-1</b> | <b>P12-5</b> | <b>p14.5-2</b> | <b>p14.5-3</b> | <b>p14.5-4</b> | <b>P49-2</b> |
|-----|----------------|----------------|----------------|--------------|--------------|----------------|----------------|----------------|--------------|
| P   | 0.7452         | 1.0983         | 1.1455         | 1.3287       | 1.1676       | 1.8634         | 1.0542         | 1.1657         | 1.3181       |
|     | 0.7565         | 1.1053         | 1.1474         | 1.336        | 1.1846       | 1.891          | 1.0998         | 1.1336         | 1.2383       |
|     | 0.75085        | 1.1018         | 1.14645        | 1.33235      | 1.1761       | 1.8772         | 1.077          | 1.14965        | 1.2782       |
| N   | 0.3805         | 0.4565         | 0.6794         | 0.5589       | 0.4486       | 0.6266         | 0.341          | 0.4474         | 0.631        |
|     | 0.3183         | 0.4673         | 0.6171         | 0.5324       | 0.4123       | 0.6685         | 0.3603         | 0.4371         | 0.6367       |
|     | 0.3494         | 0.4619         | 0.64825        | 0.54565      | 0.43045      | 0.64755        | 0.35065        | 0.44225        | 0.63385      |
| P/N | 2.14897        | 2.385365       | 1.768531       | 2.441767     | 2.732257     | 2.898927       | 3.071439       | 2.599548       | 2.016565     |

**Table S1.** Epitopes screening. The table depicts the P/N (Positive/Negative) values obtained from the evaluation of 27 selected epitopes by ELISA.

### Screening of epitopes

| pE248R-1 | pE248R-3 | pE248R-4 | P72-4    | P72-6    | P72-11   | P30-4    | P30-9    | P54-2    | P54-4    |
|----------|----------|----------|----------|----------|----------|----------|----------|----------|----------|
| 1.3161   | 1.3259   | 2.3885   | 1.2624   | 1.3261   | 1.4015   | 1.3282   | 1.5744   | 2.4357   | 1.401    |
| 1.3152   | 1.3888   | 2.4097   | 1.2589   | 1.4583   | 1.3921   | 1.3342   | 1.5882   | 2.3871   | 1.4223   |
| 1.31565  | 1.35735  | 2.3991   | 1.26065  | 1.3922   | 1.3968   | 1.3312   | 1.5813   | 2.4114   | 1.41165  |
| 0.6652   | 0.6609   | 0.6625   | 0.6514   | 0.7335   | 0.7436   | 0.7259   | 0.749    | 0.3349   | 0.2805   |
| 0.6407   | 0.6749   | 0.6595   | 0.6488   | 0.7205   | 0.741    | 0.6978   | 0.7211   | 0.3222   | 0.2789   |
| 0.65295  | 0.6679   | 0.661    | 0.6501   | 0.727    | 0.7423   | 0.71185  | 0.73505  | 0.32855  | 0.2797   |
| 2.014932 | 2.032265 | 3.629501 | 1.939163 | 1.914993 | 1.881719 | 1.870057 | 2.151282 | 7.339522 | 5.047015 |

| P54-5    | P54-6    | P54-7    | P54-9    | pp62-2   | pp62-4   | pp220-6  | pp220-10 |
|----------|----------|----------|----------|----------|----------|----------|----------|
| 3.0908   | 0.5595   | 0.7614   | 1.0174   | 1.5088   | 1.3044   | 1.5432   | 1.4388   |
| 3.1274   | 0.6251   | 0.7835   |          | 1.5051   | 1.307    | 1.5326   | 1.4358   |
| 3.1091   | 0.5923   | 0.77245  | 1.0174   | 1.50695  | 1.3057   | 1.5379   | 1.4373   |
| 0.2651   | 0.2618   | 0.252    | 0.2187   | 0.6251   | 0.6695   | 0.5188   | 0.6031   |
| 0.2645   | 0.2544   | 0.2561   | 0.2188   | 0.6208   | 0.6036   | 0.5204   | 0.5924   |
| 0.2648   | 0.2581   | 0.25405  | 0.21875  | 0.62295  | 0.63655  | 0.5196   | 0.59775  |
| 11.74131 | 2.294847 | 3.040543 | 4.650971 | 2.419054 | 2.051214 | 2.959777 | 2.404517 |
